# Supplementary material
Source: publisher figshare collection journal article supplement (https://acs.figshare.com/ndownloader/files/5734554)
Supplement: Supplementary file 1 [file 5734554]

Comment: JA027882H
  

data_tab16a 

  

_audit_creation_method            SHELXL-97 

_chemical_name_systematic 

; 

 ? 

; 

_chemical_name_common             ? 

_chemical_melting_point           ? 

_chemical_formula_moiety          ? 

_chemical_formula_sum 

 'C19 H23 Br N O4' 

_chemical_formula_weight          409.29 

  

loop_ 

 _atom_type_symbol 

 _atom_type_description 

 _atom_type_scat_dispersion_real 

 _atom_type_scat_dispersion_imag 

 _atom_type_scat_source 

 'C'  'C'   0.0033   0.0016 

 'International Tables Vol C Tables 4.2.6.8 and 6.1.1.4' 

 'H'  'H'   0.0000   0.0000 

 'International Tables Vol C Tables 4.2.6.8 and 6.1.1.4' 

 'N'  'N'   0.0061   0.0033 

 'International Tables Vol C Tables 4.2.6.8 and 6.1.1.4' 

 'O'  'O'   0.0106   0.0060 

 'International Tables Vol C Tables 4.2.6.8 and 6.1.1.4' 

 'Br'  'Br'  -0.2901   2.4595 

 'International Tables Vol C Tables 4.2.6.8 and 6.1.1.4' 

  

_symmetry_cell_setting            Monoclinic 

_symmetry_space_group_name_H-M    C2 

  

loop_ 

 _symmetry_equiv_pos_as_xyz 

 'x, y, z' 

 '-x, y, -z' 

 'x+1/2, y+1/2, z' 

 '-x+1/2, y+1/2, -z' 

  

_cell_length_a                    14.771(3) 

_cell_length_b                    5.0353(8) 

_cell_length_c                    26.110(4) 

_cell_angle_alpha                 90.00 

_cell_angle_beta                  98.800(5) 

_cell_angle_gamma                 90.00 

_cell_volume                      1919.0(5) 

_cell_formula_units_Z             4 

_cell_measurement_temperature     100(0.1) 

_cell_measurement_reflns_used     ? 

_cell_measurement_theta_min       ? 

_cell_measurement_theta_max       ? 

  

_exptl_crystal_description        ? 

_exptl_crystal_colour             ? 

_exptl_crystal_size_max           0.3 

_exptl_crystal_size_mid           0.3 

_exptl_crystal_size_min           0.1 

_exptl_crystal_density_meas       0 

_exptl_crystal_density_diffrn     1.417 

_exptl_crystal_density_method     'not measured' 

_exptl_crystal_F_000              844 

_exptl_absorpt_coefficient_mu     2.164 

_exptl_absorpt_correction_type    none 

_exptl_absorpt_correction_T_min   ? 

_exptl_absorpt_correction_T_max   ? 

_exptl_absorpt_process_details    ? 

  

_exptl_special_details 

; 

 ? 

; 

  

_diffrn_ambient_temperature       100(0.1) 

_diffrn_radiation_wavelength      0.71073 

_diffrn_radiation_type            MoK\a 

_diffrn_radiation_source          'fine-focus sealed tube' 

_diffrn_radiation_monochromator   graphite 

_diffrn_measurement_device_type   'CCD area detector' 

_diffrn_measurement_method        'phi and omega scans' 

_diffrn_detector_area_resol_mean  ? 

_diffrn_standards_number          ? 

_diffrn_standards_interval_count  ? 

_diffrn_standards_interval_time   ? 

_diffrn_standards_decay_%         ? 

_diffrn_reflns_number             6005 

_diffrn_reflns_av_R_equivalents   0.0464 

_diffrn_reflns_av_sigmaI/netI     0.0805 

_diffrn_reflns_limit_h_min        -19 

_diffrn_reflns_limit_h_max        19 

_diffrn_reflns_limit_k_min        -6 

_diffrn_reflns_limit_k_max        6 

_diffrn_reflns_limit_l_min        -26 

_diffrn_reflns_limit_l_max        34 

_diffrn_reflns_theta_min          2.99 

_diffrn_reflns_theta_max          28.30 

_reflns_number_total              3910 

_reflns_number_gt                 3029 

_reflns_threshold_expression      >2sigma(I) 

  

_computing_data_collection        'Bruker SMART' 

_computing_cell_refinement        'Bruker SMART' 

_computing_data_reduction         'Bruker SAINT' 

_computing_structure_solution     'SHELXS-97 (Sheldrick, 1990)' 

_computing_structure_refinement   'SHELXL-97 (Sheldrick, 1997)' 

_computing_molecular_graphics     'Bruker SHELXTL' 

_computing_publication_material   'Bruker SHELXTL' 

  

_refine_special_details 

; 

 Refinement of F^2^ against ALL reflections.  The weighted R-factor wR and 

 goodness of fit S are based on F^2^, conventional R-factors R are based 

 on F, with F set to zero for negative F^2^. The threshold expression of 

 F^2^ > 2sigma(F^2^) is used only for calculating R-factors(gt) etc. and is 

 not relevant to the choice of reflections for refinement.  R-factors based 

 on F^2^ are statistically about twice as large as those based on F, and R- 

 factors based on ALL data will be even larger. 

; 

  

_refine_ls_structure_factor_coef  Fsqd 

_refine_ls_matrix_type            full 

_refine_ls_weighting_scheme       calc 

_refine_ls_weighting_details 

 'calc w=1/[\s^2^(Fo^2^)+(0.0785P)^2^+0.0000P] where P=(Fo^2^+2Fc^2^)/3' 

_atom_sites_solution_primary      direct 

_atom_sites_solution_secondary    difmap 

_atom_sites_solution_hydrogens    geom 

_refine_ls_hydrogen_treatment     mixed 

_refine_ls_extinction_method      none 

_refine_ls_extinction_coef        ? 

_refine_ls_abs_structure_details 

 'Flack H D (1983), Acta Cryst. A39, 876-881' 

_refine_ls_abs_structure_Flack    0.021(16) 

_refine_ls_number_reflns          3910 

_refine_ls_number_parameters      226 

_refine_ls_number_restraints      1 

_refine_ls_R_factor_all           0.0716 

_refine_ls_R_factor_gt            0.0553 

_refine_ls_wR_factor_ref          0.1357 

_refine_ls_wR_factor_gt           0.1298 

_refine_ls_goodness_of_fit_ref    0.949 

_refine_ls_restrained_S_all       0.949 

_refine_ls_shift/su_max           0.007 

_refine_ls_shift/su_mean          0.000 

  

loop_ 

 _atom_site_label 

 _atom_site_type_symbol 

 _atom_site_fract_x 

 _atom_site_fract_y 

 _atom_site_fract_z 

 _atom_site_U_iso_or_equiv 

 _atom_site_adp_type 

 _atom_site_occupancy 

 _atom_site_symmetry_multiplicity 

 _atom_site_calc_flag 

 _atom_site_refinement_flags 

 _atom_site_disorder_assembly 

 _atom_site_disorder_group 

Br1 Br 0.85044(3) 0.97472(12) 0.708295(19) 0.04174(18) Uani 1 1 d . . . 

N1 N 0.8823(3) 1.0509(7) 0.47939(17) 0.0252(10) Uani 1 1 d . . . 

H1A H 0.8821 1.2126 0.4666 0.030 Uiso 1 1 calc R . . 

O1 O 0.8813(2) 0.9348(8) 0.39765(13) 0.0272(8) Uani 1 1 d . . . 

O2 O 0.8965(2) 0.6125(7) 0.45892(14) 0.0305(8) Uani 1 1 d . . . 

O3 O 0.7385(5) 0.7117(16) 0.0562(3) 0.096(2) Uani 1 1 d . . . 

O4 O 0.7371(19) 0.387(5) 0.1147(11) 0.153(13) Uiso 0.40(2) 1 d P . . 

O4A O 0.7813(9) 0.337(2) 0.0880(5) 0.078(5) Uiso 0.60(2) 1 d P . . 

C1 C 0.8591(3) 0.9987(14) 0.63607(18) 0.0298(11) Uani 1 1 d . . . 

C2 C 0.9100(3) 1.2017(10) 0.6189(2) 0.0282(11) Uani 1 1 d . . . 

H2A H 0.9388 1.3309 0.6425 0.034 Uiso 1 1 calc R . . 

C3 C 0.9184(3) 1.2134(10) 0.5675(2) 0.0289(11) Uani 1 1 d . . . 

H3A H 0.9531 1.3522 0.5554 0.035 Uiso 1 1 calc R . . 

C4 C 0.8769(3) 1.0259(9) 0.53300(19) 0.0230(11) Uani 1 1 d . . . 

C5 C 0.8256(3) 0.8220(10) 0.5512(2) 0.0290(11) Uani 1 1 d . . . 

H5A H 0.7963 0.6925 0.5279 0.035 Uiso 1 1 calc R . . 

C6 C 0.8176(3) 0.8103(11) 0.6032(2) 0.0306(12) Uani 1 1 d . . . 

H6A H 0.7834 0.6718 0.6159 0.037 Uiso 1 1 calc R . . 

C7 C 0.8877(3) 0.8469(10) 0.4465(2) 0.0257(11) Uani 1 1 d . . . 

C8 C 0.8992(3) 0.7440(10) 0.3594(2) 0.0290(11) Uani 1 1 d . . . 

H8A H 0.8601 0.5851 0.3608 0.035 Uiso 1 1 calc R . . 

H8B H 0.9641 0.6878 0.3661 0.035 Uiso 1 1 calc R . . 

C9 C 0.8783(4) 0.8734(11) 0.3076(2) 0.0337(12) Uani 1 1 d . . . 

H9A H 0.9175 1.0324 0.3070 0.040 Uiso 1 1 calc R . . 

H9B H 0.8136 0.9328 0.3019 0.040 Uiso 1 1 calc R . . 

C10 C 0.8942(4) 0.6845(11) 0.2633(2) 0.0375(13) Uani 1 1 d . . . 

H10A H 0.9591 0.6272 0.2693 0.045 Uiso 1 1 calc R . . 

H10B H 0.8560 0.5242 0.2650 0.045 Uiso 1 1 calc R . . 

C11 C 0.8731(4) 0.8002(13) 0.2095(2) 0.0405(14) Uani 1 1 d . . . 

H11A H 0.9089 0.9685 0.2089 0.049 Uiso 1 1 calc R . . 

C12 C 0.7722(4) 0.8678(17) 0.1945(3) 0.062(2) Uani 1 1 d . . . 

H12A H 0.7539 0.9942 0.2196 0.094 Uiso 1 1 calc R . . 

H12B H 0.7355 0.7056 0.1945 0.094 Uiso 1 1 calc R . . 

H12C H 0.7621 0.9473 0.1599 0.094 Uiso 1 1 calc R . . 

C13 C 0.9051(4) 0.6069(15) 0.1697(2) 0.0481(15) Uani 1 1 d . . . 

H13A H 0.8751 0.4311 0.1731 0.058 Uiso 1 1 calc R . . 

C14 C 1.0123(5) 0.5621(18) 0.1774(3) 0.072(3) Uani 1 1 d . . . 

C15 C 1.0378(14) 0.586(7) 0.1254(8) 0.084(7) Uiso 0.55(5) 1 d P . . 

C15A C 1.0228(10) 0.448(4) 0.1228(5) 0.038(6) Uiso 0.45(5) 1 d P . . 

C16 C 0.9686(15) 0.684(8) 0.0866(7) 0.068(8) Uiso 0.50(7) 1 d P . . 

C16A C 0.9545(14) 0.570(7) 0.0844(7) 0.061(8) Uiso 0.50(7) 1 d P . . 

C17 C 0.8786(5) 0.7037(18) 0.1129(3) 0.0613(19) Uani 1 1 d . . . 

C18 C 0.7941(8) 0.5667(18) 0.0859(3) 0.074(3) Uani 1 1 d . . . 

C19 C 0.6571(6) 0.593(3) 0.0279(4) 0.104(4) Uani 1 1 d . . . 

H19A H 0.6232 0.7267 0.0053 0.156 Uiso 1 1 calc R . . 

H19B H 0.6184 0.5257 0.0523 0.156 Uiso 1 1 calc R . . 

H19C H 0.6744 0.4461 0.0068 0.156 Uiso 1 1 calc R . . 

  

loop_ 

 _atom_site_aniso_label 

 _atom_site_aniso_U_11 

 _atom_site_aniso_U_22 

 _atom_site_aniso_U_33 

 _atom_site_aniso_U_23 

 _atom_site_aniso_U_13 

 _atom_site_aniso_U_12 

Br1 0.0345(2) 0.0474(3) 0.0448(3) 0.0050(4) 0.01107(19) -0.0002(4) 

N1 0.0229(19) 0.006(2) 0.047(3) 0.0029(15) 0.0068(18) 0.0006(14) 

O1 0.0257(14) 0.015(2) 0.0410(18) -0.0012(15) 0.0049(12) 0.0032(14) 

O2 0.0293(18) 0.0133(17) 0.050(2) 0.0003(16) 0.0091(16) 0.0006(14) 

O3 0.088(4) 0.106(6) 0.089(4) 0.015(4) 0.000(4) -0.009(4) 

C1 0.0217(18) 0.028(3) 0.040(2) -0.003(3) 0.0073(17) 0.005(3) 

C2 0.021(2) 0.021(3) 0.041(3) -0.003(2) 0.000(2) -0.002(2) 

C3 0.017(2) 0.019(3) 0.050(3) 0.000(2) 0.002(2) -0.0026(19) 

C4 0.0137(17) 0.009(3) 0.046(3) 0.0039(19) 0.0038(17) 0.0050(17) 

C5 0.021(2) 0.017(3) 0.049(3) -0.001(2) 0.006(2) -0.0012(19) 

C6 0.020(2) 0.026(3) 0.047(3) 0.001(2) 0.008(2) -0.002(2) 

C7 0.015(2) 0.014(2) 0.049(3) 0.000(2) 0.007(2) 0.0027(18) 

C8 0.025(2) 0.016(2) 0.046(3) -0.004(2) 0.008(2) 0.002(2) 

C9 0.028(2) 0.025(3) 0.048(3) -0.004(2) 0.005(2) 0.003(2) 

C10 0.033(3) 0.029(3) 0.051(3) -0.004(3) 0.009(2) 0.001(2) 

C11 0.036(3) 0.037(4) 0.049(4) 0.000(3) 0.008(3) 0.002(2) 

C12 0.048(4) 0.085(6) 0.054(4) 0.010(4) 0.007(3) 0.022(4) 

C13 0.046(3) 0.053(4) 0.046(4) 0.002(3) 0.008(3) 0.008(3) 

C14 0.051(4) 0.101(8) 0.066(4) -0.018(4) 0.015(3) 0.024(4) 

C17 0.057(4) 0.079(6) 0.047(4) -0.006(4) 0.009(3) 0.008(4) 

C18 0.110(7) 0.045(5) 0.053(5) 0.000(3) -0.028(4) 0.002(4) 

C19 0.062(5) 0.138(11) 0.104(7) -0.013(7) -0.009(5) -0.017(6) 

  

_geom_special_details 

; 

 All esds (except the esd in the dihedral angle between two l.s. planes) 

 are estimated using the full covariance matrix.  The cell esds are taken 

 into account individually in the estimation of esds in distances, angles 

 and torsion angles; correlations between esds in cell parameters are only 

 used when they are defined by crystal symmetry.  An approximate (isotropic) 

 treatment of cell esds is used for estimating esds involving l.s. planes. 

; 

  

loop_ 

 _geom_bond_atom_site_label_1 

 _geom_bond_atom_site_label_2 

 _geom_bond_distance 

 _geom_bond_site_symmetry_2 

 _geom_bond_publ_flag 

Br1 C1 1.913(5) . ? 

N1 C7 1.349(6) . ? 

N1 C4 1.420(7) . ? 

O1 C7 1.339(6) . ? 

O1 C8 1.439(6) . ? 

O2 C7 1.225(6) . ? 

O3 C18 1.270(11) . ? 

O3 C19 1.441(11) . ? 

O4 O4A 1.06(3) . ? 

O4 C18 1.51(3) . ? 

O4A C18 1.175(12) . ? 

C1 C6 1.361(8) . ? 

C1 C2 1.383(8) . ? 

C2 C3 1.368(7) . ? 

C3 C4 1.382(7) . ? 

C4 C5 1.402(6) . ? 

C5 C6 1.382(7) . ? 

C8 C9 1.490(8) . ? 

C9 C10 1.543(7) . ? 

C10 C11 1.509(8) . ? 

C11 C12 1.520(8) . ? 

C11 C13 1.549(9) . ? 

C13 C17 1.553(9) . ? 

C13 C14 1.580(9) . ? 

C14 C15 1.47(2) . ? 

C14 C15A 1.566(16) . ? 

C15 C15A 0.73(3) . ? 

C15 C16 1.41(3) . ? 

C15 C16A 1.50(3) . ? 

C15A C16A 1.45(2) . ? 

C15A C16 1.65(3) . ? 

C16 C16A 0.61(2) . ? 

C16 C17 1.59(2) . ? 

C16A C17 1.587(19) . ? 

C17 C18 1.504(12) . ? 

  

loop_ 

 _geom_angle_atom_site_label_1 

 _geom_angle_atom_site_label_2 

 _geom_angle_atom_site_label_3 

 _geom_angle 

 _geom_angle_site_symmetry_1 

 _geom_angle_site_symmetry_3 

 _geom_angle_publ_flag 

C7 N1 C4 125.3(4) . . ? 

C7 O1 C8 116.5(4) . . ? 

C18 O3 C19 119.1(9) . . ? 

O4A O4 C18 50.8(14) . . ? 

O4 O4A C18 85.1(19) . . ? 

C6 C1 C2 121.7(4) . . ? 

C6 C1 Br1 119.1(4) . . ? 

C2 C1 Br1 119.1(4) . . ? 

C3 C2 C1 119.0(5) . . ? 

C2 C3 C4 120.9(5) . . ? 

C3 C4 C5 119.2(5) . . ? 

C3 C4 N1 119.8(4) . . ? 

C5 C4 N1 120.9(4) . . ? 

C6 C5 C4 119.7(5) . . ? 

C1 C6 C5 119.5(5) . . ? 

O2 C7 O1 124.0(5) . . ? 

O2 C7 N1 125.4(5) . . ? 

O1 C7 N1 110.6(4) . . ? 

O1 C8 C9 107.6(4) . . ? 

C8 C9 C10 112.1(5) . . ? 

C11 C10 C9 115.2(5) . . ? 

C10 C11 C12 112.4(5) . . ? 

C10 C11 C13 109.9(5) . . ? 

C12 C11 C13 110.9(5) . . ? 

C11 C13 C17 112.6(6) . . ? 

C11 C13 C14 114.0(5) . . ? 

C17 C13 C14 105.5(5) . . ? 

C15 C14 C15A 27.6(11) . . ? 

C15 C14 C13 105.3(9) . . ? 

C15A C14 C13 100.0(7) . . ? 

C15A C15 C16 95(3) . . ? 

C15A C15 C14 84(3) . . ? 

C16 C15 C14 115.5(16) . . ? 

C15A C15 C16A 71(3) . . ? 

C16 C15 C16A 23.8(10) . . ? 

C14 C15 C16A 110.8(16) . . ? 

C15 C15A C16A 80(3) . . ? 

C15 C15A C14 69(2) . . ? 

C16A C15A C14 108.7(14) . . ? 

C15 C15A C16 59(3) . . ? 

C16A C15A C16 21.4(9) . . ? 

C14 C15A C16 98.7(14) . . ? 

C16A C16 C15 87(4) . . ? 

C16A C16 C17 79(3) . . ? 

C15 C16 C17 105.9(15) . . ? 

C16A C16 C15A 60(3) . . ? 

C15 C16 C15A 26.2(13) . . ? 

C17 C16 C15A 99.4(16) . . ? 

C16 C16A C15A 98(3) . . ? 

C16 C16A C15 70(3) . . ? 

C15A C16A C15 28.6(11) . . ? 

C16 C16A C17 79(3) . . ? 

C15A C16A C17 108.8(12) . . ? 

C15 C16A C17 101.8(16) . . ? 

C18 C17 C13 112.0(7) . . ? 

C18 C17 C16A 100.4(13) . . ? 

C13 C17 C16A 102.8(8) . . ? 

C18 C17 C16 117.2(14) . . ? 

C13 C17 C16 106.7(8) . . ? 

C16A C17 C16 22.1(8) . . ? 

O4A C18 O3 120.1(12) . . ? 

O4A C18 C17 123.8(12) . . ? 

O3 C18 C17 115.8(8) . . ? 

O4A C18 O4 44.1(12) . . ? 

O3 C18 O4 106.8(13) . . ? 

C17 C18 O4 121.7(11) . . ? 

  

_diffrn_measured_fraction_theta_max    0.938 

_diffrn_reflns_theta_full              28.30 

_diffrn_measured_fraction_theta_full   0.938 

_refine_diff_density_max    1.592 

_refine_diff_density_min   -0.393 

_refine_diff_density_rms    0.098 
